# Supplementary material for: Basement Membrane and Cell Integrity of Self-Tissues in Maintaining Drosophila Immunological Tolerance
Source: PubMed Central journal article supplement (PMC4199487; doi:10.1371/journal.pgen.1004683), 2014-10-16
Supplement: pgen.1004683.s006.pdf [file pgen.1004683.s006.pdf]

**Table S1. Melanotic mass formation after RNAi knockdown of various BM components**

| Category          | Gene                | RNAi strain no.   | <i>Act5C-GAL4</i>    | <i>HmlΔ-GAL4</i> | <i>FB-GAL4</i> | <i>Cg-GAL4</i>     | <i>Hsp70-GAL4</i> |         |
|-------------------|---------------------|-------------------|----------------------|------------------|----------------|--------------------|-------------------|---------|
|                   |                     |                   |                      |                  |                |                    | 48h AEL           | 96h AEL |
| control           |                     |                   | -                    | -                | -              | -                  | -                 | 2.63    |
| BM                | <i>vkg</i>          | 106812            | E-L                  | -                | -              | 2 <sup>nd</sup> -L | 73.90             | 36.25   |
|                   |                     | 16858R-3          | 1 <sup>st</sup> -L   | -                | -              | 3 <sup>rd</sup> -L | 5.40              | -       |
|                   | <i>Cg25C</i>        | 104536            | E-L                  | -                | -              | 2 <sup>nd</sup> -L | 75.90             | 27.00   |
|                   |                     | 28369             | E-L                  | -                | -              | 2 <sup>nd</sup> -L | 28.00             | -       |
|                   | <i>LanA</i>         | 28071 (BL)        | -                    | -                | -              | 11.32              | 9.04              | 5.16    |
|                   |                     | 18873             | -                    | -                | -              | 2.67               | -                 | -       |
|                   | <i>wb</i>           | 108020            | P-L                  | -                | -              | -                  | 15.30             | 24.60   |
|                   | <i>LanB1</i>        | 23119             | 3 <sup>rd</sup> -L * | -                | -              | 38.39              | -                 | -       |
|                   |                     | 23121             | E-L                  | -                | -              | 41.81              | -                 | -       |
|                   | <i>LanB2</i>        | 42559             | E-L                  | -                | -              | 52.82              | -                 | -       |
|                   |                     | 42560             | E-L                  | -                | -              | 49.53              | -                 | -       |
|                   |                     | 104013            | E-L                  | -                | -              | 26.85              | 18.40             | 28.10   |
|                   | <i>trol</i>         | 22642             | -                    | -                | -              | -                  | -                 | -       |
|                   |                     | 12497R-1          | P-semi-L             | -                | -              | -                  | -                 | -       |
|                   | <i>Ndg</i>          | 13208             | -                    | -                | -              | -                  | -                 | -       |
|                   |                     | 12908R-3          | P-semi-L             | -                | -              | -                  | -                 | -       |
|                   | BM receptor-related | <i>mew</i> (αPS1) | 44890                | P-L              | n.t.           | n.t.               | -                 | -       |
| 1771R-1           |                     |                   | -                    | n.t.             | n.t.           | -                  | -                 | -       |
| <i>if</i> (αPS2)  |                     | 100770            | -                    | n.t.             | n.t.           | -                  | -                 | -       |
|                   |                     | 44885             | E-L                  | n.t.             | n.t.           | -                  | -                 | -       |
| <i>scb</i> (αPS3) |                     | 4891              | P-L                  | -                | -              | -                  | -                 | 13.54   |
|                   |                     | 100949            | P-L                  | -                | -              | -                  | -                 | 28.63   |
| <i>ItgaPS4</i>    |                     | 16827R-2          | -                    | n.t.             | n.t.           | -                  | -                 | -       |
|                   |                     | 37172             | -                    | n.t.             | n.t.           | -                  | -                 | -       |
| <i>ItgaPS5</i>    |                     | 6646              | -                    | n.t.             | n.t.           | -                  | -                 | -       |
|                   |                     | 100120            | -                    | n.t.             | n.t.           | -                  | -                 | -       |
| <i>mys</i> (βPS)  |                     | 29619             | E-L                  | -                | -              | 44.62              | L                 | 49.64   |
|                   |                     | 1560R-1           | E-L                  | -                | -              | 0.55               | L                 | 13.57   |
|                   |                     | 33642 (BL)        | E-L                  | -                | -              | 3.05               | L                 | 33.96   |
| <i>Itgβv</i>      |                     | 893               | -                    | n.t.             | n.t.           | -                  | -                 | -       |
|                   |                     | 1762R-1           | -                    | n.t.             | n.t.           | -                  | -                 | -       |
| <i>Dg</i>         |                     | 107029            | -                    | -                | -              | -                  | 20.10             | 16.80   |
| <i>Dys</i>        |                     | 106401            | -                    | -                | -              | -                  | L                 | 25.53   |
|                   | 106578              | -                 | -                    | -                | -              | L                  | 25.00             |         |

The numbers of larvae containing melanotic masses are presented in percentages (%). For each experiment, n ≥ 150.

-: no melanotic mass was observed. n.t.: not tested. \*: escapers had melanotic masses.

E-L: embryo lethal. 1<sup>st</sup>-L, 2<sup>nd</sup>-L, or 3<sup>rd</sup>-L: 1<sup>st</sup>, 2<sup>nd</sup>, or 3<sup>rd</sup> instar larva lethal, respectively. P-L: pupa lethal. P-semi-L: pupa semi-lethal. L: lethal (stage not determined).

*Act5C-GAL4*: ubiquitous expression with early onset [65].

---

*HmlΔ-GAL4*: larval hemocytes, lymph gland [40].  
*FB-GAL4*: fat body, wing discs, central nerve system [28].  
*Cg-GAL4*: embryonic and larval hemocytes, fat body [56].  
*Hsp70-GAL4*: heat shock inducible [66].

---

## References

65. Ito K, Awano W, Suzuki K, Hiromi Y, Yamamoto D (1997) The *Drosophila* mushroom body is a quadruple structure of clonal units each of which contains a virtually identical set of neurones and glial cells. *Development* 124: 761-771.
66. Brand AH, Perrimon N (1993) Targeted gene expression as a means of altering cell fates and generating dominant phenotypes. *Development* 118: 401-415.
