# Supplementary material for: Basement Membrane and Cell Integrity of Self-Tissues in Maintaining Drosophila Immunological Tolerance
Source: PubMed Central journal article supplement (PMC4199487; doi:10.1371/journal.pgen.1004683), 2014-10-16
Supplement: pgen.1004683.s007.pdf [file pgen.1004683.s007.pdf]

**Table S2. Examination of melanotic mass-associated genes**

| Gene name [ref]      | CG no.  | RNAi strain no.         | <i>Act5C-GAL4</i>     | <i>Cg-GAL4</i> | <i>FB-GAL4</i> | Information                                                                  |
|----------------------|---------|-------------------------|-----------------------|----------------|----------------|------------------------------------------------------------------------------|
| <i>abs</i> [67]      | CG14637 | 14637R-2                | -, P-L                | n.t.           | n.t.           |                                                                              |
| <i>Acn</i> [68]      | CG10473 | 10473R-1                | -                     | n.t.           | n.t.           |                                                                              |
|                      |         | 10473R-3                | -                     | n.t.           | n.t.           |                                                                              |
| <i>cact</i> [19]     | CG5848  | 5848R-1                 | -                     | n.t.           | n.t.           | BM of <i>ubc9</i> mutant larvae analyzed in [19]                             |
|                      |         | 5848R-3                 | MM, P-L               | n.t.           | n.t.           |                                                                              |
| <i>Cct2</i> [28]     | CG18330 | 18330R-2                | n.t.                  | -              | -              |                                                                              |
|                      |         | 18330R-3                | n.t.                  | -              | -              |                                                                              |
| <i>CSN5</i> [28]     | CG14884 | 14884R-1                | -, MZ                 | n.t.           | n.t.           | MZ in 3 <sup>rd</sup> instar larvae                                          |
| <i>Cul4</i> [28]     | CG8711  | 44829                   | n.t.                  | MM             | MM             | FB, SG, and IDs absent ( <i>Cg-GAL4</i> ); a very rare MM ( <i>FB-GAL4</i> ) |
|                      |         | 8711R-1                 | n.t.                  | -              | -              |                                                                              |
|                      |         | 8711R-2                 | n.t.                  | -              | -              |                                                                              |
| <i>Dcp-1</i> [6]     | CG5370  | 5370R-1                 | -                     | n.t.           | n.t.           |                                                                              |
| <i>Dref</i> [28]     | CG5838  | 5838R-1                 | -, 2 <sup>nd</sup> -L | n.t.           | n.t.           |                                                                              |
|                      |         | 5838R-4                 | -, MZ, P-L            | n.t.           | n.t.           | MZ in 3 <sup>rd</sup> instar larvae                                          |
| <i>gig</i> [69]      | CG6975  | 6975R-2                 | -                     | n.t.           | n.t.           |                                                                              |
|                      |         | 6975R-8                 | -                     | n.t.           | n.t.           |                                                                              |
| <i>heix</i> [70]     | CG5876  | 5876R-1                 | -, P-L                | n.t.           | n.t.           |                                                                              |
|                      |         | 5876R-2                 | -                     | n.t.           | n.t.           |                                                                              |
| <i>Hsc70-4</i> [71]  | CG4264  | 4264R-1                 | -, 2 <sup>nd</sup> -L | n.t.           | n.t.           |                                                                              |
|                      |         | 4264R-2                 | -                     | n.t.           | n.t.           |                                                                              |
| <i>hyx</i> [28]      | CG11990 | 11990R-2                | n.t.                  | MM             | -              | Figure S1                                                                    |
|                      |         | 11990R-3                | n.t.                  | MM             | -              |                                                                              |
| <i>krz</i> [6]       | CG1487  | 103756                  | MM, P-L               | MM             | -              | Figure S1                                                                    |
|                      |         | 41559                   | -                     | -              | -              |                                                                              |
|                      |         | 33880 (BL)              | -                     | -              | -              |                                                                              |
|                      |         | 29523 (BL)              | -                     | -              | -              |                                                                              |
|                      |         | <i>krz<sup>dl</sup></i> | n.t.                  | n.t.           | n.t.           | A mutant allele; 1 <sup>st</sup> -L                                          |
| <i>l(2)37Cd</i> [68] | CG10563 | 10563R-2                | -, MZ                 | n.t.           | n.t.           | MZ in some 3 <sup>rd</sup> instar larvae                                     |
|                      |         | 10563R-3                | -, MZ                 | n.t.           | n.t.           |                                                                              |
| <i>l(2)37Ce</i> [68] | CG17347 | 17347R-1                | -                     | n.t.           | n.t.           |                                                                              |
|                      |         | 17347R-2                | -                     | n.t.           | n.t.           |                                                                              |
| <i>l(3)mbn</i> [6]   | CG12755 | 12755R-1                | -                     | n.t.           | n.t.           |                                                                              |
|                      |         | 12755R-2                | -                     | n.t.           | n.t.           |                                                                              |
| <i>Lim3</i> [72]     | CG10699 | 10699R-4                | -                     | n.t.           | n.t.           |                                                                              |
|                      |         | 10699R-5                | -                     | n.t.           | n.t.           |                                                                              |
| <i>mib2</i> [68]     | CG17492 | 17492R-1                | -                     | n.t.           | n.t.           |                                                                              |
|                      |         | 17492R-3                | -                     | n.t.           | n.t.           |                                                                              |
| <i>morgue</i> [73]   | CG15437 | 15437R-1                | -                     | n.t.           | n.t.           |                                                                              |

|                       |         |                               |                            |      |      |                                                          |
|-----------------------|---------|-------------------------------|----------------------------|------|------|----------------------------------------------------------|
|                       |         | 15437R-2                      | -, MZ                      | n.t. | n.t. | MZ in pupae                                              |
| <i>mrn</i> [74]       | CG7764  | 7764R-2                       | -                          | n.t. | n.t. |                                                          |
| <i>mRpS30</i> [28]    | CG8470  | 8470R-4                       | n.t.                       | MM   | -    | Figure S1                                                |
|                       |         | 8470R-3                       | n.t.                       | MM   | -    |                                                          |
| <i>Nc</i> [6]         | CG8091  | 8091R-1                       | -, MZ                      | n.t. | n.t. | MZ in pupae                                              |
| <i>pita</i> [75]      | CG3941  | 3941R-1                       | -                          | n.t. | n.t. |                                                          |
|                       |         | 3941R-2                       | -, MZ                      | n.t. | n.t. | MZ in 3 <sup>rd</sup> instar larvae                      |
| <i>Pof</i> [76]       | CG3691  | 3691R-1                       | -                          | n.t. | n.t. |                                                          |
|                       |         | 3691R-3                       | -                          | n.t. | n.t. |                                                          |
| <i>pr-set7</i> [6]    | CG3307  | 3307R-3                       | -, MZ                      | n.t. | n.t. | MZ in 3 <sup>rd</sup> instar larvae                      |
| <i>pUf68</i> [77]     | CG12085 | 12085R-2                      | MM, 2 <sup>nd</sup> -L     | n.t. | n.t. | MM in LG of 2 <sup>nd</sup> instar larvae                |
|                       |         | 12085R-4                      | MM, MZ, 2 <sup>nd</sup> -L | n.t. | n.t. | MM in LG of 2 <sup>nd</sup> instar larvae; MZ in trachea |
| <i>rnh1</i> [78]      | CG8729  | 8729R-1                       | -                          | n.t. | n.t. |                                                          |
|                       |         | 8729R-2                       | -                          | n.t. | n.t. |                                                          |
| <i>skpA</i> [6]       | CG16983 | 16983R-2                      | -, MZ                      | n.t. | n.t. | MZ in pupae                                              |
|                       |         | 16983R-3                      | -, 2 <sup>nd</sup> -L      | n.t. | n.t. |                                                          |
| <i>spag</i> [6]       | CG13570 | <i>spag</i> <sup>k12101</sup> | n.t.                       | n.t. | n.t. | A mutant allele; Figure S1                               |
| <i>Su(var)205</i> [6] | CG8409  | 8409R-2                       | -                          | n.t. | n.t. |                                                          |
|                       |         | 8409R-4                       | -, MZ                      | n.t. | n.t. | MZ in some pupae                                         |
| <i>Top3a</i> [79]     | CG10123 | 10123R-1                      | -, 2 <sup>nd</sup> -L      | n.t. | n.t. |                                                          |
| <i>Tsc1</i> [80]      | CG6147  | 6147R-1                       | -, MZ                      | n.t. | n.t. | MZ in pupae                                              |
|                       |         | 6147R-2                       | -, P-L                     | n.t. | n.t. |                                                          |
| <i>ush</i> [35]       | CG2762  | 2762R-4                       | n.t.                       | MM   | -    | Blood cell tumor [35]                                    |
|                       |         | 2762R-2                       | n.t.                       | MM   | -    |                                                          |
| <i>Zfrp8</i> [6]      | CG3260  | 3260R-2                       | -, P-L                     | n.t. | n.t. |                                                          |
|                       |         | 3260R-6                       | -, P-L                     | n.t. | n.t. |                                                          |

MM: melanotic masses ("melanotic nodules" [6]). MZ: melanization in larval cuticle, trachea, or pupal cuticle. -: no melanotic mass was observed. n.t.: not tested.

2<sup>nd</sup>-L or 3<sup>rd</sup>-L: 2<sup>nd</sup> or 3<sup>rd</sup> instar larva lethal, respectively. P-L: pupa lethal.

FB, SG, ID, and LG indicate fat body, salivary gland, imaginal disc, and lymph gland, respectively.

## References

67. Schmucker D, Vorbruggen G, Yeghiayan P, Fan HQ, Jackle H, et al. (2000) The *Drosophila* gene *abstrakt*, required for visual system development, encodes a putative RNA helicase of the DEAD box protein family. *Mechanisms of Development* 91: 189-196.
68. Stathakis DG, Pentz ES, Freeman ME, Kullman J, Hankins GR, et al. (1995) The genetic and molecular organization of the *Dopa* decarboxylase gene cluster of *Drosophila melanogaster*. *Genetics* 141: 629-655.
69. Ito N, Rubin GM (1999) *gigas*, a *Drosophila* homolog of tuberous sclerosis gene product-2, regulates the cell cycle. *Cell* 96: 529-539.

70. Ashburner M, Misra S, Roote J, Lewis SE, Blazej R, et al. (1999) An exploration of the sequence of a 2.9-Mb region of the genome of *Drosophila melanogaster*. The Adh region. *Genetics* 153: 179-219.
71. Chang HC, Newmyer SL, Hull MJ, Ebersold M, Schmid SL, et al. (2002) Hsc70 is required for endocytosis and clathrin function in *Drosophila*. *Journal of Cell Biology* 159: 477-487.
72. Wright TRF (1996) The Wilhelmine E. Key 1992 Invitational lecture. Phenotypic analysis of the Dopa decarboxylase gene cluster mutants in *Drosophila melanogaster*. *Journal of Heredity* 87: 175-190.
73. Hays R, Wickline L, Cagan R (2002) Morgue mediates apoptosis in the *Drosophila melanogaster* retina by promoting degradation of DIAP1. *Nature Cell Biology* 4: 425-431.
74. Fregoso M, Laine JP, Aguilar-Fuentes J, Mocquet V, Reynaud E, et al. (2007) DNA repair and transcriptional deficiencies caused by mutations in the *Drosophila* p52 subunit of TFIID generate developmental defects and chromosome fragility. *Molecular and Cellular Biology* 27: 3640-3650.
75. Laundrie B, Peterson JS, Baum JS, Chang JC, Fileppo D, et al. (2003) Germline cell death is inhibited by P-element insertions disrupting the dcp-1/pita nested gene pair in *Drosophila*. *Genetics* 165: 1881-1888.
76. Larsson J, Svensson MJ, Stenberg P, Makitalo M (2004) Painting of fourth in genus *Drosophila* suggests autosome-specific gene regulation. *Proceedings of the National Academy of Sciences of the United States of America* 101: 9728-9733.
77. Van Buskirk C, Schupbach T (2002) half pint regulates alternative splice site selection in *Drosophila*. *Developmental Cell* 2: 343-353.
78. Filippov V, Filippova M, Gill SS (2001) *Drosophila* RNase H1 is essential for development but not for proliferation. *Molecular Genetics and Genomics* 265: 771-777.
79. Plank JL, Hai Chu S, Reineke Pohlhaus J, Wilson-Sali T, Hsieh TS (2005) *Drosophila melanogaster* topoisomerase IIIalpha preferentially relaxes a positively or negatively supercoiled bubble substrate and is essential during development. *Journal of Biological Chemistry* 280: 3564-3573.
80. Potter CJ, Huang H, Xu T (2001) *Drosophila* Tsc1 functions with Tsc2 to antagonize insulin signaling in regulating cell growth, cell proliferation, and organ size. *Cell* 105: 357-368.
